# Supplementary material
Source: MDPI journal article supplement (https://www.mdpi.com/1999-4907/11/2/153)
Supplement: s1 [file s1]

Archive with 3 entries (3 files):
- Supplemental Materials/Supplemental Material 1.pdf
- Supplemental Materials/Supplemental Material 2.pdf
- Supplemental Materials/Supplemental Material 3.xlsx
