# Supplementary material
Source: MDPI journal article supplement (https://www.mdpi.com/1999-4907/11/2/153)
Supplement: s1 [file s1 › Supplemental Materials/Supplemental Material 1.pdf]

## Deliverable on D5.2.1

### Harmonized protocol for evaluation of plus trees of keystone riparian tree species in the field (Oak, Ash, Alder, Poplar, Elm)

Selection priorities of keystone riparian tree species:

- Conservation
- Economic value
- Resistance/tolerance

| Species                            | Conservation | Economic value | Resistance/tolerance |
|------------------------------------|--------------|----------------|----------------------|
| <i>Quercus robur</i> L.            | 2            | 1              |                      |
| <i>Fraxinus angustifolia</i> Vahl. |              |                | 1                    |
| <i>Populus nigra</i> L.            | 1            | 2              | 3                    |
| <i>Ulmus minor</i> Mill.           | 2            | 3              | 1                    |
| <i>Alnus glutinosa</i> Gaertn.     | 3            | 1              | 2                    |
| <i>Ulmus leavis</i> Pall.          | 2            | 3              | 1                    |
| <i>Fraxinus excelsior</i> L.       |              |                | 1                    |

**Legend:**

**1 – most important priority**

**2 – important priority**

**3 – less important priority**

\* there is no need to define species with all three priorities

### *Quercus robur* L. – Pedunculate oak

Forest stands:

- ➔ older
- ➔ most productive

Comparative trees – used for objective comparison with candidates

- 4-6 neighboring **dominant** trees

Target phenotypic traits:

1. Stem form
2. Crown form
3. Stem taper
4. Grain straightness
5. Health condition

### Stem form quality (2-5)

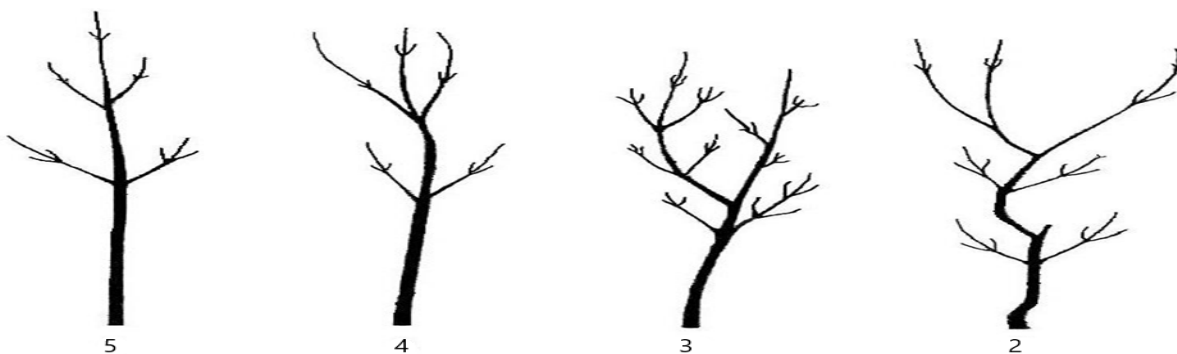

| Grade | Description                                                                                                        |
|-------|--------------------------------------------------------------------------------------------------------------------|
| 5     | Excellent. Straight stem, apical domination, without strong competitive branches in the top.                       |
| 4     | Good. Weaker apical domination and/or single curved stem.                                                          |
| 3     | Less good. Bad apical domination and/or more than one stem curve. Fork in upper 2/3 of the tree height.            |
| 2     | Bad. Very weak apical domination, more than two curves. Low fork (below 2/3 of the tree height) or multiple forks. |

### Crown form quality (2-5)

| Grade | Description                                                                                                                 |
|-------|-----------------------------------------------------------------------------------------------------------------------------|
| 5     | Excellent. Relatively thin branches with flat insertion angle ( $>60^\circ$ ). Fairly symmetrical crown.                    |
| 4     | Good. No more than one thick branch and/or smaller insertion angle ( $45-60^\circ$ ); Less fairly symmetrical.              |
| 3     | Less good. More than one thick branches. Acute insertion angle ( $<45^\circ$ ). Asymmetrical and/or not properly developed. |
| 2     | Bad. Multiple forks, acute branch insertion angle. Weakly developed and/or extremely asymmetrical                           |

### Stem taper

| Grade | Description                                                                                         |
|-------|-----------------------------------------------------------------------------------------------------|
| 5     | Excellent. Very low degree of taper. (very small decrease of diameter as a function of stem height) |
| 3     | Good. Moderate degree of taper.                                                                     |
| 1     | Bad. High degree of taper.                                                                          |

### Grain spiraling

| Grade | Description            |
|-------|------------------------|
| 5     | No bark twisting.      |
| 1     | Visible bark twisting. |

### Health condition

| Grade | Description                                                                                  |
|-------|----------------------------------------------------------------------------------------------|
| 5     | Completely healthy tree without any visible symptoms.                                        |
| 1     | Unhealthy. Visible symptoms such as cankers, many epicormics, stem cracks, less foliage etc. |

**Low grades for health condition and grain spiraling are eliminatory!!!**

**Fraxinus angustifolia Vahl. – Narrow-leaved ash**

- Healthy tree/Resistant tree
- Defoliation under 30%

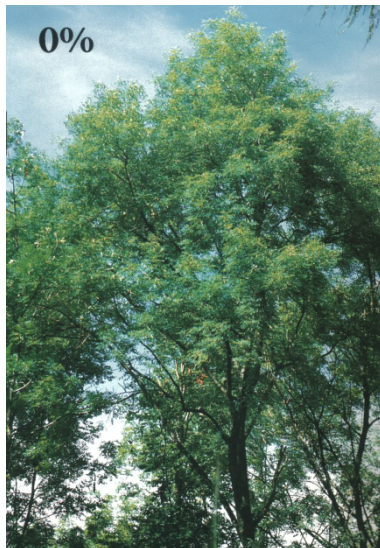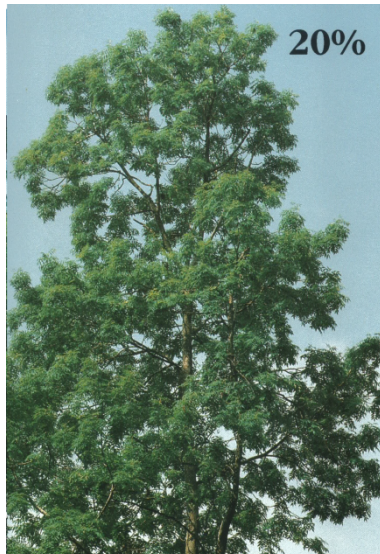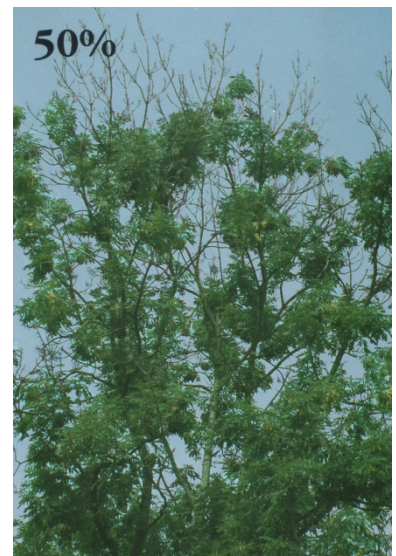

e.g. Pictures of defoliation on *Fraxinus excelsior* L. (During project pictures of *Fraxinus angustifolia* Vahl. will be made)

Source: Sanasilva Tree Crown Photos with percentage of foliage loss; Swiss Federal Institute for Forest, Snow and Landscape Research CH-8903 Birmensdorf; 2<sup>nd</sup> Revised and extended; Edition 1990

- Phenotypic traits are additional (see for *Q. robur* L.)

**Populus nigra L. – black poplar**

- Older than 70 years (approx.)

Additional:

- Straight
- Wood production quality
- Health condition

### *Alnus glutiosa* Gaertn. – black alder

Forest stands:

- ➔ older
- ➔ most productive

Comparative trees – used for objective comparison with candidates

- 4-6 neighboring **dominant** trees

Target phenotypic traits:

1. Stem form
2. Crown form
3. Grain straightness
4. Health condition

### Stem form quality (2-5)



| Grade | Description                                                                                                        |
|-------|--------------------------------------------------------------------------------------------------------------------|
| 5     | Excellent. Straight stem, apical domination, without strong competitive branches in the top.                       |
| 4     | Good. Weaker apical domination and/or single curved stem.                                                          |
| 3     | Less good. Bad apical domination and/or more than one stem curve. Fork in upper 2/3 of the tree height.            |
| 2     | Bad. Very weak apical domination, more than two curves. Low fork (below 2/3 of the tree height) or multiple forks. |

### Crown form quality (2-5)

| Grade | Description                                                                                                                 |
|-------|-----------------------------------------------------------------------------------------------------------------------------|
| 5     | Excellent. Relatively thin branches with flat insertion angle ( $>60^\circ$ ). Fairly symmetrical crown.                    |
| 4     | Good. No more than one thick branch and/or smaller insertion angle ( $45-60^\circ$ ); Less fairly symmetrical.              |
| 3     | Less good. More than one thick branches. Acute insertion angle ( $<45^\circ$ ). Asymmetrical and/or not properly developed. |
| 2     | Bad. Multiple forks, acute branch insertion angle. Weakly developed and/or extremely asymmetrical                           |

### Grain spiraling

| Grade | Description            |
|-------|------------------------|
| 5     | No bark twisting.      |
| 1     | Visible bark twisting. |

### Health condition

| Grade | Description                                                                                 |
|-------|---------------------------------------------------------------------------------------------|
| 5     | Completely healthy tree without any visible symptoms.                                       |
| 1     | Unhealthy. Visible symptoms such as cankers, many epicormics, stem cracks, less foliage etc |

**Low grades for health condition and grain spiraling are eliminatory!!!**

Additional:

- Genotype representative

### *Ulmus minor* L. – field elm

- Healthy tree/Resistant tree
- Old tree
