# Supplementary material
Source: MDPI journal article supplement (https://www.mdpi.com/1999-4907/11/2/153)
Supplement: s1 [file s1 › Supplemental Materials/Supplemental Material 2.pdf]

Supplemental material 1. Biometric data and coordinates of the chosen mother trees.

|                                | <b>Genotype<br/>1</b> | <b>Genotype 2</b> | <b>Genotype<br/>3</b> | <b>Genotype<br/>4</b> | <b>Genotype<br/>5</b> |
|--------------------------------|-----------------------|-------------------|-----------------------|-----------------------|-----------------------|
| Longitude                      | 45.9126               | 45.9142           | 45.9136               | 45.9150               | 45.9148               |
| Latitude                       | 18.8842               | 18.8812           | 18.8786               | 18.8798               | 18.8860               |
| Diameter at breast height (cm) | 88                    | 90                | 84                    | 89                    | 85                    |
| Total height (m)               | 34.4                  | 32.3              | 29.1                  | 35.2                  | 31.4                  |
| Stem form quality              | 5                     | 5                 | 5                     | 5                     | 5                     |
| Crown form quality             | 5                     | 5                 | 5                     | 5                     | 5                     |
| Stem taper                     | 5                     | 5                 | 5                     | 5                     | 5                     |
| Grain spiralling               | 5                     | 5                 | 5                     | 5                     | 5                     |
| Health condition               | 5                     | 5                 | 5                     | 5                     | 5                     |
