# Supplementary material
Source: MDPI journal article supplement (https://www.mdpi.com/1999-4907/11/2/153)
Supplement: s1 [file s1 › Supplemental Materials/Supplemental Material 3.xlsx]

## Sheet: Bar graphs of chloropyll a f.
			Bar graphs of chlorophyll a fluorescence measured during wet and drought period in five Q. robur half-sib lines
	Y (II)
	Y (NPQ)
	NPQ
	qN
	qP
	qL
	ETR

## Sheet: ANOVA qN
	General Linear Model
	Within-Subjects Factors
	Measure: MEASURE_1
	SEASON		Dependent Variable
	1	1	qN1_1
		2	qN1_2
		3	qN1_3
		4	qN1_4
		5	qN1_5
	2	1	qN2_1
		2	qN2_2
		3	qN2_3
		4	qN2_4
		5	qN2_5
	Descriptive Statistics
		Mean	Std. Deviation	N
	qN1_1	0.355244	0.225956	45
	qN1_2	0.394333	0.202741	45
	qN1_3	0.471422	0.209722	45
	qN1_4	0.378867	0.20713	45
	qN1_5	0.353289	0.275894	45
	qN2_1	0.167844	0.223548	45
	qN2_2	0.1166	0.217916	45
	qN2_3	0.379667	0.327102	45
	qN2_4	0.2088	0.268402	45
	qN2_5	0.124489	0.252314	45
	Multivariate Testsa
	Effect		Value	F	Hypothesis df	Error df	Sig.	Partial Eta Squared
	SEASON	Pillai's Trace	0.553563	54.558b	1	44	3.11574e-09	0.553563
		Wilks' Lambda	0.446437	54.558b	1	44	3.11574e-09	0.553563
		Hotelling's Trace	1.23996	54.558b	1	44	3.11574e-09	0.553563
		Roy's Largest Root	1.23996	54.558b	1	44	3.11574e-09	0.553563
	HALFSIBLINE	Pillai's Trace	0.482324	9.550b	4	41	1.49666e-05	0.482324
		Wilks' Lambda	0.517676	9.550b	4	41	1.49666e-05	0.482324
		Hotelling's Trace	0.93171	9.550b	4	41	1.49666e-05	0.482324
		Roy's Largest Root	0.93171	9.550b	4	41	1.49666e-05	0.482324
	SEASON * HALFSIBLINE	Pillai's Trace	0.412549	7.198b	4	41	0.000173656	0.412549
		Wilks' Lambda	0.587451	7.198b	4	41	0.000173656	0.412549
		Hotelling's Trace	0.702269	7.198b	4	41	0.000173656	0.412549
		Roy's Largest Root	0.702269	7.198b	4	41	0.000173656	0.412549
	a. Design: Intercept Within Subjects Design: SEASON + HALFSIBLINE + SEASON * HALFSIBLINE
	b. Exact statistic
	Mauchly's Test of Sphericitya
	Measure: MEASURE_1
	Within Subjects Effect	Mauchly's W	Approx. Chi-Square	df	Sig.	Epsilonb
						Greenhouse-Geisser	Huynh-Feldt	Lower-bound
	SEASON	1	0	0		1	1	1
	HALFSIBLINE	0.423822	36.4123	9	3.39883e-05	0.690632	0.74152	0.25
	SEASON * HALFSIBLINE	0.539631	26.1655	9	0.00193408	0.7957	0.864991	0.25
	Tests the null hypothesis that the error covariance matrix of the orthonormalized transformed dependent variables is proportional to an identity matrix.
	a. Design: Intercept Within Subjects Design: SEASON + HALFSIBLINE + SEASON * HALFSIBLINE
	b. May be used to adjust the degrees of freedom for the averaged tests of significance. Corrected tests are displayed in the Tests of Within-Subjects Effects table.
	Tests of Within-Subjects Effects
	Measure: MEASURE_1
	Source		Type III Sum of Squares	df	Mean Square	F	Sig.	Partial Eta Squared
	SEASON	Sphericity Assumed	4.11061	1	4.11061	54.5582	3.11574e-09	0.553563
		Greenhouse-Geisser	4.11061	1	4.11061	54.5582	3.11574e-09	0.553563
		Huynh-Feldt	4.11061	1	4.11061	54.5582	3.11574e-09	0.553563
		Lower-bound	4.11061	1	4.11061	54.5582	3.11574e-09	0.553563
	Error(SEASON)	Sphericity Assumed	3.31512	44	0.0753436
		Greenhouse-Geisser	3.31512	44	0.0753436
		Huynh-Feldt	3.31512	44	0.0753436
		Lower-bound	3.31512	44	0.0753436
	HALFSIBLINE	Sphericity Assumed	2.05864	4	0.514661	12.4974	5.70646e-09	0.221203
		Greenhouse-Geisser	2.05864	2.76253	0.745203	12.4974	7.83056e-07	0.221203
		Huynh-Feldt	2.05864	2.96608	0.694062	12.4974	3.474e-07	0.221203
		Lower-bound	2.05864	1	2.05864	12.4974	0.000972854	0.221203
	Error(HALFSIBLINE)	Sphericity Assumed	7.24794	176	0.0411815
		Greenhouse-Geisser	7.24794	121.551	0.0596287
		Huynh-Feldt	7.24794	130.508	0.0555365
		Lower-bound	7.24794	44	0.164726
	SEASON * HALFSIBLINE	Sphericity Assumed	0.43317	4	0.108293	3.27657	0.0127699	0.0693064
		Greenhouse-Geisser	0.43317	3.1828	0.136097	3.27657	0.0207528	0.0693064
		Huynh-Feldt	0.43317	3.45997	0.125195	3.27657	0.0175878	0.0693064
		Lower-bound	0.43317	1	0.43317	3.27657	0.0771086	0.0693064
	Error(SEASON*HALFSIBLINE)	Sphericity Assumed	5.81691	176	0.0330506
		Greenhouse-Geisser	5.81691	140.043	0.0415365
		Huynh-Feldt	5.81691	152.238	0.0382092
		Lower-bound	5.81691	44	0.132202
	Tests of Within-Subjects Contrasts
	Measure: MEASURE_1
	Source			Type III Sum of Squares	df	Mean Square	F	Sig.	Partial Eta Squared
	SEASON	Linear		4.11061	1	4.11061	54.5582	3.11574e-09	0.553563
	Error(SEASON)	Linear		3.31512	44	0.0753436
	HALFSIBLINE		Linear	0.000434028	1	0.000434028	0.0133704	0.908472	0.00030378
			Quadratic	1.02612	1	1.02612	15.1404	0.000334153	0.256008
			Cubic	0.0889034	1	0.0889034	3.56571	0.0655889	0.0749638
			Order 4	0.94319	1	0.94319	23.8433	1.41781e-05	0.351447
	Error(HALFSIBLINE)		Linear	1.42832	44	0.0324619
			Quadratic	2.98202	44	0.0677732
			Cubic	1.09705	44	0.0249329
			Order 4	1.74055	44	0.0395578
	SEASON * HALFSIBLINE	Linear	Linear	0.00139129	1	0.00139129	0.0413916	0.839722	0.000939834
			Quadratic	0.0649876	1	0.0649876	2.3356	0.133604	0.0504061
			Cubic	0.148302	1	0.148302	3.16134	0.0823126	0.0670324
			Order 4	0.21849	1	0.21849	9.15963	0.00412421	0.172304
	Error(SEASON*HALFSIBLINE)	Linear	Linear	1.47897	44	0.0336129
			Quadratic	1.22429	44	0.0278249
			Cubic	2.06409	44	0.0469112
			Order 4	1.04956	44	0.0238535
	Tests of Between-Subjects Effects
	Measure: MEASURE_1 Transformed Variable: Average
	Source	Type III Sum of Squares	df	Mean Square	F	Sig.	Partial Eta Squared
	Intercept	39.176	1	39.176	175.638	5.78589e-17	0.79967
	Error	9.81421	44	0.22305
	Estimated Marginal Means
	1. SEASON
	Measure: MEASURE_1
	SEASON	Mean	Std. Error	95% Confidence Interval
				Lower Bound	Upper Bound
	1	0.390631	0.0293301	0.33152	0.449742
	2	0.19948	0.0215857	0.155977	0.242983
	2. HALFSIBLINE
	Measure: MEASURE_1
	HALFSIBLINE	Mean	Std. Error	95% Confidence Interval
				Lower Bound	Upper Bound
	1	0.261544	0.0279219	0.205272	0.317817
	2	0.255467	0.0246566	0.205775	0.305159
	3	0.425544	0.0361046	0.35278	0.498308
	4	0.293833	0.0240625	0.245339	0.342328
	5	0.238889	0.0322258	0.173942	0.303836
	3. SEASON * HALFSIBLINE
	Measure: MEASURE_1
	SEASON		Mean	Std. Error	95% Confidence Interval
					Lower Bound	Upper Bound
	1	1	0.355244	0.0336835	0.28736	0.423129
		2	0.394333	0.0302228	0.333423	0.455243
		3	0.471422	0.0312635	0.408415	0.53443
		4	0.378867	0.0308771	0.316638	0.441095
		5	0.353289	0.0411279	0.270401	0.436177
	2	1	0.167844	0.0333246	0.100683	0.235006
		2	0.1166	0.032485	0.0511308	0.182069
		3	0.379667	0.0487614	0.281394	0.477939
		4	0.2088	0.040011	0.128163	0.289437
		5	0.124489	0.0376127	0.0486855	0.200292

## Sheet: ANOVA Y(II)
	General Linear Model
	Within-Subjects Factors
	Measure: MEASURE_1
	SEASON		Dependent Variable
	1	1	YII1_1
		2	YII1_2
		3	YII1_3
		4	YII1_4
		5	YII1_5
	2	1	YII2_1
		2	YII2_2
		3	YII2_3
		4	YII2_4
		5	YII2_5
	Descriptive Statistics
		Mean	Std. Deviation	N
	YII1_1	0.282289	0.185003	45
	YII1_2	0.294044	0.185324	45
	YII1_3	0.226178	0.113381	45
	YII1_4	0.290933	0.160761	45
	YII1_5	0.233622	0.136727	45
	YII2_1	0.221911	0.157208	45
	YII2_2	0.172244	0.115271	45
	YII2_3	0.146867	0.093165	45
	YII2_4	0.132533	0.0790517	45
	YII2_5	0.199333	0.148919	45
	Multivariate Testsa
	Effect		Value	F	Hypothesis df	Error df	Sig.	Partial Eta Squared
	SEASON	Pillai's Trace	0.677546	92.453b	1	44	2.20896e-12	0.677546
		Wilks' Lambda	0.322454	92.453b	1	44	2.20896e-12	0.677546
		Hotelling's Trace	2.10122	92.453b	1	44	2.20896e-12	0.677546
		Roy's Largest Root	2.10122	92.453b	1	44	2.20896e-12	0.677546
	HALFSIBLINE	Pillai's Trace	0.344472	5.386b	4	41	0.00140135	0.344472
		Wilks' Lambda	0.655528	5.386b	4	41	0.00140135	0.344472
		Hotelling's Trace	0.525488	5.386b	4	41	0.00140135	0.344472
		Roy's Largest Root	0.525488	5.386b	4	41	0.00140135	0.344472
	SEASON * HALFSIBLINE	Pillai's Trace	0.435871	7.920b	4	41	7.95123e-05	0.435871
		Wilks' Lambda	0.564129	7.920b	4	41	7.95123e-05	0.435871
		Hotelling's Trace	0.772646	7.920b	4	41	7.95123e-05	0.435871
		Roy's Largest Root	0.772646	7.920b	4	41	7.95123e-05	0.435871
	a. Design: Intercept Within Subjects Design: SEASON + HALFSIBLINE + SEASON * HALFSIBLINE
	b. Exact statistic
	Mauchly's Test of Sphericitya
	Measure: MEASURE_1
	Within Subjects Effect	Mauchly's W	Approx. Chi-Square	df	Sig.	Epsilonb
						Greenhouse-Geisser	Huynh-Feldt	Lower-bound
	SEASON	1	0	0		1	1	1
	HALFSIBLINE	0.267354	55.9553	9	8.28055e-09	0.683834	0.733619	0.25
	SEASON * HALFSIBLINE	0.198602	68.5645	9	3.05855e-11	0.575181	0.608719	0.25
	Tests the null hypothesis that the error covariance matrix of the orthonormalized transformed dependent variables is proportional to an identity matrix.
	a. Design: Intercept Within Subjects Design: SEASON + HALFSIBLINE + SEASON * HALFSIBLINE
	b. May be used to adjust the degrees of freedom for the averaged tests of significance. Corrected tests are displayed in the Tests of Within-Subjects Effects table.
	Tests of Within-Subjects Effects
	Measure: MEASURE_1
	Source		Type III Sum of Squares	df	Mean Square	F	Sig.	Partial Eta Squared
	SEASON	Sphericity Assumed	0.928249	1	0.928249	92.4535	2.20896e-12	0.677546
		Greenhouse-Geisser	0.928249	1	0.928249	92.4535	2.20896e-12	0.677546
		Huynh-Feldt	0.928249	1	0.928249	92.4535	2.20896e-12	0.677546
		Lower-bound	0.928249	1	0.928249	92.4535	2.20896e-12	0.677546
	Error(SEASON)	Sphericity Assumed	0.441767	44	0.0100402
		Greenhouse-Geisser	0.441767	44	0.0100402
		Huynh-Feldt	0.441767	44	0.0100402
		Lower-bound	0.441767	44	0.0100402
	HALFSIBLINE	Sphericity Assumed	0.216422	4	0.0541056	6.66613	5.10845e-05	0.13157
		Greenhouse-Geisser	0.216422	2.73534	0.0791209	6.66613	0.000515465	0.13157
		Huynh-Feldt	0.216422	2.93447	0.0737516	6.66613	0.000357309	0.13157
		Lower-bound	0.216422	1	0.216422	6.66613	0.013233	0.13157
	Error(HALFSIBLINE)	Sphericity Assumed	1.4285	176	0.00811648
		Greenhouse-Geisser	1.4285	120.355	0.0118691
		Huynh-Feldt	1.4285	129.117	0.0110636
		Lower-bound	1.4285	44	0.0324659
	SEASON * HALFSIBLINE	Sphericity Assumed	0.22009	4	0.0550224	6.25698	9.91142e-05	0.1245
		Greenhouse-Geisser	0.22009	2.30072	0.0956611	6.25698	0.00172323	0.1245
		Huynh-Feldt	0.22009	2.43488	0.0903905	6.25698	0.00137179	0.1245
		Lower-bound	0.22009	1	0.22009	6.25698	0.0161647	0.1245
	Error(SEASON*HALFSIBLINE)	Sphericity Assumed	1.5477	176	0.00879376
		Greenhouse-Geisser	1.5477	101.232	0.0152887
		Huynh-Feldt	1.5477	107.135	0.0144463
		Lower-bound	1.5477	44	0.0351751
	Tests of Within-Subjects Contrasts
	Measure: MEASURE_1
	Source			Type III Sum of Squares	df	Mean Square	F	Sig.	Partial Eta Squared
	SEASON	Linear		0.928249	1	0.928249	92.4535	2.20896e-12	0.677546
	Error(SEASON)	Linear		0.441767	44	0.0100402
	HALFSIBLINE		Linear	0.0772655	1	0.0772655	11.3422	0.00158299	0.204947
			Quadratic	0.0913923	1	0.0913923	6.59013	0.0137312	0.130265
			Cubic	0.00046656	1	0.00046656	0.0621276	0.804324	0.00141
			Order 4	0.0472979	1	0.0472979	11.0613	0.00178551	0.200891
	Error(HALFSIBLINE)		Linear	0.299736	44	0.00681219
			Quadratic	0.610194	44	0.0138681
			Cubic	0.330427	44	0.00750971
			Order 4	0.188143	44	0.00427598
	SEASON * HALFSIBLINE	Linear	Linear	0.000546001	1	0.000546001	0.104371	0.748177	0.00236645
			Quadratic	0.100036	1	0.100036	6.41761	0.0149383	0.127289
			Cubic	0.0221811	1	0.0221811	2.92428	0.0943	0.0623192
			Order 4	0.0973265	1	0.0973265	14.3745	0.000452692	0.246246
	Error(SEASON*HALFSIBLINE)	Linear	Linear	0.23018	44	0.00523136
			Quadratic	0.685861	44	0.0155877
			Cubic	0.333747	44	0.00758516
			Order 4	0.297915	44	0.00677079
	Tests of Between-Subjects Effects
	Measure: MEASURE_1 Transformed Variable: Average
	Source	Type III Sum of Squares	df	Mean Square	F	Sig.	Partial Eta Squared
	Intercept	21.7791	1	21.7791	176.505	5.30296e-17	0.800458
	Error	5.42921	44	0.123391
	Estimated Marginal Means
	1. SEASON
	Measure: MEASURE_1
	SEASON	Mean	Std. Error	95% Confidence Interval
				Lower Bound	Upper Bound
	1	0.265413	0.0196918	0.225727	0.305099
	2	0.174578	0.014327	0.145704	0.203452
	2. HALFSIBLINE
	Measure: MEASURE_1
	HALFSIBLINE	Mean	Std. Error	95% Confidence Interval
				Lower Bound	Upper Bound
	1	0.2521	0.0238504	0.204033	0.300167
	2	0.233144	0.0203053	0.192222	0.274067
	3	0.186522	0.0126958	0.160936	0.212109
	4	0.211733	0.0152022	0.181095	0.242371
	5	0.216478	0.018929	0.178329	0.254627
	3. SEASON * HALFSIBLINE
	Measure: MEASURE_1
	SEASON		Mean	Std. Error	95% Confidence Interval
					Lower Bound	Upper Bound
	1	1	0.282289	0.0275786	0.226708	0.33787
		2	0.294044	0.0276265	0.238367	0.349722
		3	0.226178	0.0169018	0.192114	0.260241
		4	0.290933	0.0239649	0.242635	0.339231
		5	0.233622	0.0203821	0.192545	0.2747
	2	1	0.221911	0.0234352	0.174681	0.269142
		2	0.172244	0.0171837	0.137613	0.206876
		3	0.146867	0.0138882	0.118877	0.174857
		4	0.132533	0.0117843	0.108784	0.156283
		5	0.199333	0.0221995	0.154593	0.244073

## Sheet: ANOVA qP
	General Linear Model
	Within-Subjects Factors
	Measure: MEASURE_1
	SEASON		Dependent Variable
	1	1	qP1_1
		2	qP1_2
		3	qP1_3
		4	qP1_4
		5	qP1_5
	2	1	qP2_1
		2	qP2_2
		3	qP2_3
		4	qP2_4
		5	qP2_5
	Descriptive Statistics
		Mean	Std. Deviation	N
	qP1_1	0.769111	0.234809	45
	qP1_2	0.561778	0.254649	45
	qP1_3	0.464289	0.245027	45
	qP1_4	0.731644	0.263712	45
	qP1_5	0.878844	0.168608	45
	qP2_1	0.560178	0.288575	45
	qP2_2	0.548733	0.295395	45
	qP2_3	0.520489	0.290356	45
	qP2_4	0.527533	0.312429	45
	qP2_5	0.618689	0.315199	45
	Multivariate Testsa
	Effect		Value	F	Hypothesis df	Error df	Sig.	Partial Eta Squared
	SEASON	Pillai's Trace	0.534449	50.512b	1	44	7.96507e-09	0.534449
		Wilks' Lambda	0.465551	50.512b	1	44	7.96507e-09	0.534449
		Hotelling's Trace	1.14799	50.512b	1	44	7.96507e-09	0.534449
		Roy's Largest Root	1.14799	50.512b	1	44	7.96507e-09	0.534449
	HALFSIBLINE	Pillai's Trace	0.735133	28.449b	4	41	2.38833e-11	0.735133
		Wilks' Lambda	0.264867	28.449b	4	41	2.38833e-11	0.735133
		Hotelling's Trace	2.77548	28.449b	4	41	2.38833e-11	0.735133
		Roy's Largest Root	2.77548	28.449b	4	41	2.38833e-11	0.735133
	SEASON * HALFSIBLINE	Pillai's Trace	0.625914	17.150b	4	41	2.43656e-08	0.625914
		Wilks' Lambda	0.374086	17.150b	4	41	2.43656e-08	0.625914
		Hotelling's Trace	1.67318	17.150b	4	41	2.43656e-08	0.625914
		Roy's Largest Root	1.67318	17.150b	4	41	2.43656e-08	0.625914
	a. Design: Intercept Within Subjects Design: SEASON + HALFSIBLINE + SEASON * HALFSIBLINE
	b. Exact statistic
	Mauchly's Test of Sphericitya
	Measure: MEASURE_1
	Within Subjects Effect	Mauchly's W	Approx. Chi-Square	df	Sig.	Epsilonb
						Greenhouse-Geisser	Huynh-Feldt	Lower-bound
	SEASON	1	0	0		1	1	1
	HALFSIBLINE	0.425966	36.1982	9	3.70937e-05	0.703038	0.755968	0.25
	SEASON * HALFSIBLINE	0.761098	11.5795	9	0.238403	0.885564	0.972629	0.25
	Tests the null hypothesis that the error covariance matrix of the orthonormalized transformed dependent variables is proportional to an identity matrix.
	a. Design: Intercept Within Subjects Design: SEASON + HALFSIBLINE + SEASON * HALFSIBLINE
	b. May be used to adjust the degrees of freedom for the averaged tests of significance. Corrected tests are displayed in the Tests of Within-Subjects Effects table.
	Tests of Within-Subjects Effects
	Measure: MEASURE_1
	Source		Type III Sum of Squares	df	Mean Square	F	Sig.	Partial Eta Squared
	SEASON	Sphericity Assumed	1.7863	1	1.7863	50.5117	7.96507e-09	0.534449
		Greenhouse-Geisser	1.7863	1	1.7863	50.5117	7.96507e-09	0.534449
		Huynh-Feldt	1.7863	1	1.7863	50.5117	7.96507e-09	0.534449
		Lower-bound	1.7863	1	1.7863	50.5117	7.96507e-09	0.534449
	Error(SEASON)	Sphericity Assumed	1.55602	44	0.0353641
		Greenhouse-Geisser	1.55602	44	0.0353641
		Huynh-Feldt	1.55602	44	0.0353641
		Lower-bound	1.55602	44	0.0353641
	HALFSIBLINE	Sphericity Assumed	3.52124	4	0.880309	26.1975	4.75318e-17	0.373197
		Greenhouse-Geisser	3.52124	2.81215	1.25215	26.1975	1.15186e-12	0.373197
		Huynh-Feldt	3.52124	3.02387	1.16448	26.1975	1.89846e-13	0.373197
		Lower-bound	3.52124	1	3.52124	26.1975	6.5162e-06	0.373197
	Error(HALFSIBLINE)	Sphericity Assumed	5.9141	176	0.0336028
		Greenhouse-Geisser	5.9141	123.735	0.0477966
		Huynh-Feldt	5.9141	133.05	0.04445
		Lower-bound	5.9141	44	0.134411
	SEASON * HALFSIBLINE	Sphericity Assumed	1.73099	4	0.432747	15.0491	1.33895e-10	0.254858
		Greenhouse-Geisser	1.73099	3.54226	0.488668	15.0491	1.24391e-09	0.254858
		Huynh-Feldt	1.73099	3.89052	0.444925	15.0491	2.28084e-10	0.254858
		Lower-bound	1.73099	1	1.73099	15.0491	0.00034638	0.254858
	Error(SEASON*HALFSIBLINE)	Sphericity Assumed	5.06098	176	0.0287556
		Greenhouse-Geisser	5.06098	155.859	0.0324715
		Huynh-Feldt	5.06098	171.183	0.0295648
		Lower-bound	5.06098	44	0.115022
	Tests of Within-Subjects Contrasts
	Measure: MEASURE_1
	Source			Type III Sum of Squares	df	Mean Square	F	Sig.	Partial Eta Squared
	SEASON	Linear		1.7863	1	1.7863	50.5117	7.96507e-09	0.534449
	Error(SEASON)	Linear		1.55602	44	0.0353641
	HALFSIBLINE		Linear	0.529596	1	0.529596	20.3906	4.68625e-05	0.316671
			Quadratic	2.77658	1	2.77658	46.9962	1.86305e-08	0.516463
			Cubic	0.0374939	1	0.0374939	1.82522	0.183599	0.0398301
			Order 4	0.177572	1	0.177572	6.1623	0.0169377	0.122847
	Error(HALFSIBLINE)		Linear	1.14279	44	0.0259725
			Quadratic	2.59956	44	0.0590808
			Cubic	0.903851	44	0.0205421
			Order 4	1.2679	44	0.0288158
	SEASON * HALFSIBLINE	Linear	Linear	0.193835	1	0.193835	5.19288	0.0275875	0.105562
			Quadratic	1.11631	1	1.11631	41.0708	8.45368e-08	0.482784
			Cubic	0.24638	1	0.24638	10.6001	0.00217954	0.19414
			Order 4	0.174464	1	0.174464	6.39718	0.0150886	0.126935
	Error(SEASON*HALFSIBLINE)	Linear	Linear	1.64239	44	0.0373271
			Quadratic	1.19592	44	0.0271801
			Cubic	1.0227	44	0.0232432
			Order 4	1.19997	44	0.027272
	Tests of Between-Subjects Effects
	Measure: MEASURE_1 Transformed Variable: Average
	Source	Type III Sum of Squares	df	Mean Square	F	Sig.	Partial Eta Squared
	Intercept	171.937	1	171.937	386.379	2.048e-23	0.897765
	Error	19.5799	44	0.444997
	Estimated Marginal Means
	1. SEASON
	Measure: MEASURE_1
	SEASON	Mean	Std. Error	95% Confidence Interval
				Lower Bound	Upper Bound
	1	0.681133	0.0264739	0.627779	0.734488
	2	0.555124	0.0378691	0.478804	0.631445
	2. HALFSIBLINE
	Measure: MEASURE_1
	HALFSIBLINE	Mean	Std. Error	95% Confidence Interval
				Lower Bound	Upper Bound
	1	0.664644	0.0340537	0.596014	0.733275
	2	0.555256	0.0372485	0.480186	0.630325
	3	0.492389	0.0384448	0.414908	0.569869
	4	0.629589	0.0378538	0.5533	0.705878
	5	0.748767	0.0313025	0.685681	0.811853
	3. SEASON * HALFSIBLINE
	Measure: MEASURE_1
	SEASON		Mean	Std. Error	95% Confidence Interval
					Lower Bound	Upper Bound
	1	1	0.769111	0.0350032	0.698567	0.839655
		2	0.561778	0.0379608	0.485273	0.638283
		3	0.464289	0.0365264	0.390675	0.537903
		4	0.731644	0.0393119	0.652417	0.810872
		5	0.878844	0.0251345	0.828189	0.9295
	2	1	0.560178	0.0430183	0.47348	0.646875
		2	0.548733	0.0440348	0.459987	0.63748
		3	0.520489	0.0432837	0.433256	0.607722
		4	0.527533	0.0465741	0.433669	0.621397
		5	0.618689	0.0469871	0.523993	0.713385

## Sheet: ANOVA Y(NPQ)
	General Linear Model
	Within-Subjects Factors
	Measure: MEASURE_1
	SEASON		Dependent Variable
	1	1	YNPQ1_1
		2	YNPQ1_2
		3	YNPQ1_3
		4	YNPQ1_4
		5	YNPQ1_5
	2	1	YNPQ2_1
		2	YNPQ2_2
		3	YNPQ2_3
		4	YNPQ2_4
		5	YNPQ2_5
	Descriptive Statistics
		Mean	Std. Deviation	N
	YNPQ1_1	0.110978	0.0914917	46
	YNPQ1_2	0.197196	0.137376	46
	YNPQ1_3	0.277022	0.165465	46
	YNPQ1_4	0.132783	0.129831	46
	YNPQ1_5	0.0553261	0.0665058	46
	YNPQ2_1	0.213522	0.16122	46
	YNPQ2_2	0.263565	0.149327	46
	YNPQ2_3	0.243783	0.154509	46
	YNPQ2_4	0.19337	0.125559	46
	YNPQ2_5	0.213326	0.152533	46
	Multivariate Testsa
	Effect		Value	F	Hypothesis df	Error df	Sig.	Partial Eta Squared
	SEASON	Pillai's Trace	0.326967	21.862b	1	45	2.6862e-05	0.326967
		Wilks' Lambda	0.673033	21.862b	1	45	2.6862e-05	0.326967
		Hotelling's Trace	0.485811	21.862b	1	45	2.6862e-05	0.326967
		Roy's Largest Root	0.485811	21.862b	1	45	2.6862e-05	0.326967
	HALFSIBLINE	Pillai's Trace	0.804232	43.135b	4	42	2.39429e-14	0.804232
		Wilks' Lambda	0.195768	43.135b	4	42	2.39429e-14	0.804232
		Hotelling's Trace	4.10808	43.135b	4	42	2.39429e-14	0.804232
		Roy's Largest Root	4.10808	43.135b	4	42	2.39429e-14	0.804232
	SEASON * HALFSIBLINE	Pillai's Trace	0.73906	29.739b	4	42	9.23379e-12	0.73906
		Wilks' Lambda	0.26094	29.739b	4	42	9.23379e-12	0.73906
		Hotelling's Trace	2.83229	29.739b	4	42	9.23379e-12	0.73906
		Roy's Largest Root	2.83229	29.739b	4	42	9.23379e-12	0.73906
	a. Design: Intercept Within Subjects Design: SEASON + HALFSIBLINE + SEASON * HALFSIBLINE
	b. Exact statistic
	Mauchly's Test of Sphericitya
	Measure: MEASURE_1
	Within Subjects Effect	Mauchly's W	Approx. Chi-Square	df	Sig.	Epsilonb
						Greenhouse-Geisser	Huynh-Feldt	Lower-bound
	SEASON	1	0	0		1	1	1
	HALFSIBLINE	0.202668	69.3011	9	2.19172e-11	0.57514	0.607887	0.25
	SEASON * HALFSIBLINE	0.220183	65.7023	9	1.10059e-10	0.576353	0.609263	0.25
	Tests the null hypothesis that the error covariance matrix of the orthonormalized transformed dependent variables is proportional to an identity matrix.
	a. Design: Intercept Within Subjects Design: SEASON + HALFSIBLINE + SEASON * HALFSIBLINE
	b. May be used to adjust the degrees of freedom for the averaged tests of significance. Corrected tests are displayed in the Tests of Within-Subjects Effects table.
	Tests of Within-Subjects Effects
	Measure: MEASURE_1
	Source		Type III Sum of Squares	df	Mean Square	F	Sig.	Partial Eta Squared
	SEASON	Sphericity Assumed	0.577304	1	0.577304	21.8615	2.6862e-05	0.326967
		Greenhouse-Geisser	0.577304	1	0.577304	21.8615	2.6862e-05	0.326967
		Huynh-Feldt	0.577304	1	0.577304	21.8615	2.6862e-05	0.326967
		Lower-bound	0.577304	1	0.577304	21.8615	2.6862e-05	0.326967
	Error(SEASON)	Sphericity Assumed	1.18833	45	0.0264073
		Greenhouse-Geisser	1.18833	45	0.0264073
		Huynh-Feldt	1.18833	45	0.0264073
		Lower-bound	1.18833	45	0.0264073
	HALFSIBLINE	Sphericity Assumed	1.0287	4	0.257176	36.3577	2.94015e-22	0.446887
		Greenhouse-Geisser	1.0287	2.30056	0.447154	36.3577	8.40956e-14	0.446887
		Huynh-Feldt	1.0287	2.43155	0.423065	36.3577	1.8665e-14	0.446887
		Lower-bound	1.0287	1	1.0287	36.3577	2.82062e-07	0.446887
	Error(HALFSIBLINE)	Sphericity Assumed	1.27323	180	0.00707349
		Greenhouse-Geisser	1.27323	103.525	0.0122987
		Huynh-Feldt	1.27323	109.42	0.0116362
		Lower-bound	1.27323	45	0.028294
	SEASON * HALFSIBLINE	Sphericity Assumed	0.44987	4	0.112467	12.6474	4.32359e-09	0.219393
		Greenhouse-Geisser	0.44987	2.30541	0.195136	12.6474	4.14026e-06	0.219393
		Huynh-Feldt	0.44987	2.43705	0.184596	12.6474	2.42016e-06	0.219393
		Lower-bound	0.44987	1	0.44987	12.6474	0.000898836	0.219393
	Error(SEASON*HALFSIBLINE)	Sphericity Assumed	1.60065	180	0.0088925
		Greenhouse-Geisser	1.60065	103.744	0.0154289
		Huynh-Feldt	1.60065	109.667	0.0145955
		Lower-bound	1.60065	45	0.03557
	Tests of Within-Subjects Contrasts
	Measure: MEASURE_1
	Source			Type III Sum of Squares	df	Mean Square	F	Sig.	Partial Eta Squared
	SEASON	Linear		0.577304	1	0.577304	21.8615	2.6862e-05	0.326967
	Error(SEASON)	Linear		1.18833	45	0.0264073
	HALFSIBLINE		Linear	0.139531	1	0.139531	27.9029	3.57398e-06	0.38274
			Quadratic	0.677585	1	0.677585	53.3777	3.59179e-09	0.542579
			Cubic	0.104711	1	0.104711	22.3584	2.25878e-05	0.331932
			Order 4	0.106875	1	0.106875	18.0657	0.000106091	0.286459
	Error(HALFSIBLINE)		Linear	0.225027	45	0.00500061
			Quadratic	0.571237	45	0.0126942
			Cubic	0.210749	45	0.00468331
			Order 4	0.266216	45	0.0059159
	SEASON * HALFSIBLINE	Linear	Linear	0.0254205	1	0.0254205	9.0021	0.00438536	0.166699
			Quadratic	0.348549	1	0.348549	77.7861	2.28176e-11	0.633509
			Cubic	0.0103314	1	0.0103314	1.47266	0.231258	0.0316887
			Order 4	0.0655685	1	0.0655685	3.0856	0.0857912	0.064169
	Error(SEASON*HALFSIBLINE)	Linear	Linear	0.127073	45	0.00282385
			Quadratic	0.201639	45	0.00448087
			Cubic	0.315697	45	0.00701548
			Order 4	0.956242	45	0.0212498
	Tests of Between-Subjects Effects
	Measure: MEASURE_1 Transformed Variable: Average
	Source	Type III Sum of Squares	df	Mean Square	F	Sig.	Partial Eta Squared
	Intercept	16.6212	1	16.6212	171.664	5.79637e-17	0.792305
	Error	4.35708	45	0.096824
	Estimated Marginal Means
	1. SEASON
	Measure: MEASURE_1
	SEASON	Mean	Std. Error	95% Confidence Interval
				Lower Bound	Upper Bound
	1	0.154661	0.0124807	0.129523	0.179798
	2	0.225513	0.0194941	0.18625	0.264776
	2. HALFSIBLINE
	Measure: MEASURE_1
	HALFSIBLINE	Mean	Std. Error	95% Confidence Interval
				Lower Bound	Upper Bound
	1	0.16225	0.01651	0.128997	0.195503
	2	0.23038	0.01984	0.190421	0.27034
	3	0.260402	0.0164212	0.227328	0.293476
	4	0.163076	0.0144151	0.134043	0.19211
	5	0.134326	0.0147078	0.104703	0.163949
	3. SEASON * HALFSIBLINE
	Measure: MEASURE_1
	SEASON		Mean	Std. Error	95% Confidence Interval
					Lower Bound	Upper Bound
	1	1	0.110978	0.0134897	0.0838086	0.138148
		2	0.197196	0.020255	0.1564	0.237991
		3	0.277022	0.0243964	0.227885	0.326159
		4	0.132783	0.0191426	0.0942275	0.171338
		5	0.0553261	0.00980575	0.0355763	0.0750759
	2	1	0.213522	0.0237706	0.165645	0.261398
		2	0.263565	0.0220171	0.219221	0.30791
		3	0.243783	0.022781	0.197899	0.289666
		4	0.19337	0.0185127	0.156083	0.230656
		5	0.213326	0.0224897	0.168029	0.258623

## Sheet: ANOVA qL
	General Linear Model
	Within-Subjects Factors
	Measure: MEASURE_1
	SEASON		Dependent Variable
	1	1	qL1_1
		2	qL1_2
		3	qL1_3
		4	qL1_4
		5	qL1_5
	2	1	qL2_1
		2	qL2_2
		3	qL2_3
		4	qL2_4
		5	qL2_5
	Descriptive Statistics
		Mean	Std. Deviation	N
	qL1_1	0.710244	0.281722	45
	qL1_2	0.4404	0.280945	45
	qL1_3	0.309289	0.243686	45
	qL1_4	0.646044	0.319472	45
	qL1_5	0.8568	0.194837	45
	qL2_1	0.486978	0.314168	45
	qL2_2	0.446133	0.309147	45
	qL2_3	0.447156	0.322853	45
	qL2_4	0.507444	0.309911	45
	qL2_5	0.560911	0.345532	45
	Multivariate Testsa
	Effect		Value	F	Hypothesis df	Error df	Sig.	Partial Eta Squared
	SEASON	Pillai's Trace	0.391119	28.264b	1	44	3.37011e-06	0.391119
		Wilks' Lambda	0.608881	28.264b	1	44	3.37011e-06	0.391119
		Hotelling's Trace	0.642356	28.264b	1	44	3.37011e-06	0.391119
		Roy's Largest Root	0.642356	28.264b	1	44	3.37011e-06	0.391119
	HALFSIBLINE	Pillai's Trace	0.793861	39.474b	4	41	1.50543e-13	0.793861
		Wilks' Lambda	0.206139	39.474b	4	41	1.50543e-13	0.793861
		Hotelling's Trace	3.85111	39.474b	4	41	1.50543e-13	0.793861
		Roy's Largest Root	3.85111	39.474b	4	41	1.50543e-13	0.793861
	SEASON * HALFSIBLINE	Pillai's Trace	0.696317	23.502b	4	41	3.74612e-10	0.696317
		Wilks' Lambda	0.303683	23.502b	4	41	3.74612e-10	0.696317
		Hotelling's Trace	2.29291	23.502b	4	41	3.74612e-10	0.696317
		Roy's Largest Root	2.29291	23.502b	4	41	3.74612e-10	0.696317
	a. Design: Intercept Within Subjects Design: SEASON + HALFSIBLINE + SEASON * HALFSIBLINE
	b. Exact statistic
	Mauchly's Test of Sphericitya
	Measure: MEASURE_1
	Within Subjects Effect	Mauchly's W	Approx. Chi-Square	df	Sig.	Epsilonb
						Greenhouse-Geisser	Huynh-Feldt	Lower-bound
	SEASON	1	0	0		1	1	1
	HALFSIBLINE	0.455585	33.3469	9	0.000117636	0.733898	0.792059	0.25
	SEASON * HALFSIBLINE	0.527375	27.1401	9	0.00133699	0.75925	0.821869	0.25
	Tests the null hypothesis that the error covariance matrix of the orthonormalized transformed dependent variables is proportional to an identity matrix.
	a. Design: Intercept Within Subjects Design: SEASON + HALFSIBLINE + SEASON * HALFSIBLINE
	b. May be used to adjust the degrees of freedom for the averaged tests of significance. Corrected tests are displayed in the Tests of Within-Subjects Effects table.
	Tests of Within-Subjects Effects
	Measure: MEASURE_1
	Source		Type III Sum of Squares	df	Mean Square	F	Sig.	Partial Eta Squared
	SEASON	Sphericity Assumed	1.1896	1	1.1896	28.2637	3.37011e-06	0.391119
		Greenhouse-Geisser	1.1896	1	1.1896	28.2637	3.37011e-06	0.391119
		Huynh-Feldt	1.1896	1	1.1896	28.2637	3.37011e-06	0.391119
		Lower-bound	1.1896	1	1.1896	28.2637	3.37011e-06	0.391119
	Error(SEASON)	Sphericity Assumed	1.85193	44	0.0420894
		Greenhouse-Geisser	1.85193	44	0.0420894
		Huynh-Feldt	1.85193	44	0.0420894
		Lower-bound	1.85193	44	0.0420894
	HALFSIBLINE	Sphericity Assumed	6.19385	4	1.54846	34.3541	3.49885e-21	0.438447
		Greenhouse-Geisser	6.19385	2.93559	2.10991	34.3541	3.57377e-16	0.438447
		Huynh-Feldt	6.19385	3.16824	1.95498	34.3541	2.86349e-17	0.438447
		Lower-bound	6.19385	1	6.19385	34.3541	5.39527e-07	0.438447
	Error(HALFSIBLINE)	Sphericity Assumed	7.93295	176	0.0450736
		Greenhouse-Geisser	7.93295	129.166	0.0614167
		Huynh-Feldt	7.93295	139.402	0.0569069
		Lower-bound	7.93295	44	0.180294
	SEASON * HALFSIBLINE	Sphericity Assumed	2.76248	4	0.690621	17.6502	3.37143e-12	0.286296
		Greenhouse-Geisser	2.76248	3.037	0.90961	17.6502	8.71432e-10	0.286296
		Huynh-Feldt	2.76248	3.28748	0.840305	17.6502	2.04936e-10	0.286296
		Lower-bound	2.76248	1	2.76248	17.6502	0.000127549	0.286296
	Error(SEASON*HALFSIBLINE)	Sphericity Assumed	6.88658	176	0.0391283
		Greenhouse-Geisser	6.88658	133.628	0.0515355
		Huynh-Feldt	6.88658	144.649	0.0476089
		Lower-bound	6.88658	44	0.156513
	Tests of Within-Subjects Contrasts
	Measure: MEASURE_1
	Source			Type III Sum of Squares	df	Mean Square	F	Sig.	Partial Eta Squared
	SEASON	Linear		1.1896	1	1.1896	28.2637	3.37011e-06	0.391119
	Error(SEASON)	Linear		1.85193	44	0.0420894
	HALFSIBLINE		Linear	1.12763	1	1.12763	29.4339	2.3407e-06	0.400822
			Quadratic	4.51957	1	4.51957	75.6605	4.10198e-11	0.632293
			Cubic	0.221025	1	0.221025	6.4034	0.0150427	0.127043
			Order 4	0.325614	1	0.325614	6.82172	0.0122722	0.134228
	Error(HALFSIBLINE)		Linear	1.68567	44	0.0383106
			Quadratic	2.62834	44	0.0597349
			Cubic	1.51874	44	0.0345169
			Order 4	2.1002	44	0.0477319
	SEASON * HALFSIBLINE	Linear	Linear	0.188674	1	0.188674	4.33142	0.0432668	0.0896191
			Quadratic	2.24226	1	2.24226	46.0872	2.33376e-08	0.511584
			Cubic	0.105019	1	0.105019	3.74745	0.0593293	0.0784849
			Order 4	0.226536	1	0.226536	6.24462	0.0162634	0.124284
	Error(SEASON*HALFSIBLINE)	Linear	Linear	1.91662	44	0.0435595
			Quadratic	2.14071	44	0.0486525
			Cubic	1.23306	44	0.0280241
			Order 4	1.59619	44	0.036277
	Tests of Between-Subjects Effects
	Measure: MEASURE_1 Transformed Variable: Average
	Source	Type III Sum of Squares	df	Mean Square	F	Sig.	Partial Eta Squared
	Intercept	131.775	1	131.775	267.426	2.57896e-20	0.858714
	Error	21.6811	44	0.492752
	Estimated Marginal Means
	1. SEASON
	Measure: MEASURE_1
	SEASON	Mean	Std. Error	95% Confidence Interval
				Lower Bound	Upper Bound
	1	0.592556	0.0280375	0.53605	0.649061
	2	0.489724	0.039887	0.409338	0.570111
	2. HALFSIBLINE
	Measure: MEASURE_1
	HALFSIBLINE	Mean	Std. Error	95% Confidence Interval
				Lower Bound	Upper Bound
	1	0.598611	0.0377968	0.522437	0.674786
	2	0.443267	0.0407847	0.361071	0.525463
	3	0.378222	0.0407155	0.296166	0.460279
	4	0.576744	0.039277	0.497587	0.655902
	5	0.708856	0.0344366	0.639453	0.778258
	3. SEASON * HALFSIBLINE
	Measure: MEASURE_1
	SEASON		Mean	Std. Error	95% Confidence Interval
					Lower Bound	Upper Bound
	1	1	0.710244	0.0419967	0.625606	0.794883
		2	0.4404	0.0418808	0.355995	0.524805
		3	0.309289	0.0363266	0.236077	0.3825
		4	0.646044	0.0476241	0.550064	0.742024
		5	0.8568	0.0290446	0.798265	0.915335
	2	1	0.486978	0.0468334	0.392591	0.581364
		2	0.446133	0.0460849	0.353255	0.539011
		3	0.447156	0.0481281	0.35016	0.544151
		4	0.507444	0.0461988	0.414337	0.600552
		5	0.560911	0.0515089	0.457102	0.66472

## Sheet: ANOVA NPQ
	General Linear Model
	Within-Subjects Factors
	Measure: MEASURE_1
	SEASON		Dependent Variable
	1	1	NPQ1_1
		2	NPQ1_2
		3	NPQ1_3
		4	NPQ1_4
		5	NPQ1_5
	2	1	NPQ2_1
		2	NPQ2_2
		3	NPQ2_3
		4	NPQ2_4
		5	NPQ2_5
	Descriptive Statistics
		Mean	Std. Deviation	N
	NPQ1_1	0.158844	0.135293	45
	NPQ1_2	0.345622	0.259134	45
	NPQ1_3	0.500733	0.455206	45
	NPQ1_4	0.214356	0.212334	45
	NPQ1_5	0.0770667	0.0964097	45
	NPQ2_1	0.381978	0.287012	45
	NPQ2_2	0.582822	0.359722	45
	NPQ2_3	0.546178	0.392336	45
	NPQ2_4	0.457622	0.357244	45
	NPQ2_5	0.531089	0.464055	45
	Multivariate Testsa
	Effect		Value	F	Hypothesis df	Error df	Sig.	Partial Eta Squared
	SEASON	Pillai's Trace	0.496099	43.319b	1	44	4.70353e-08	0.496099
		Wilks' Lambda	0.503901	43.319b	1	44	4.70353e-08	0.496099
		Hotelling's Trace	0.984517	43.319b	1	44	4.70353e-08	0.496099
		Roy's Largest Root	0.984517	43.319b	1	44	4.70353e-08	0.496099
	HALFSIBLINE	Pillai's Trace	0.59712	15.192b	4	41	1.06666e-07	0.59712
		Wilks' Lambda	0.40288	15.192b	4	41	1.06666e-07	0.59712
		Hotelling's Trace	1.48213	15.192b	4	41	1.06666e-07	0.59712
		Roy's Largest Root	1.48213	15.192b	4	41	1.06666e-07	0.59712
	SEASON * HALFSIBLINE	Pillai's Trace	0.49676	10.118b	4	41	8.60947e-06	0.49676
		Wilks' Lambda	0.50324	10.118b	4	41	8.60947e-06	0.49676
		Hotelling's Trace	0.987122	10.118b	4	41	8.60947e-06	0.49676
		Roy's Largest Root	0.987122	10.118b	4	41	8.60947e-06	0.49676
	a. Design: Intercept Within Subjects Design: SEASON + HALFSIBLINE + SEASON * HALFSIBLINE
	b. Exact statistic
	Mauchly's Test of Sphericitya
	Measure: MEASURE_1
	Within Subjects Effect	Mauchly's W	Approx. Chi-Square	df	Sig.	Epsilonb
						Greenhouse-Geisser	Huynh-Feldt	Lower-bound
	SEASON	1	0	0		1	1	1
	HALFSIBLINE	0.210167	66.1637	9	8.97217e-11	0.653539	0.69853	0.25
	SEASON * HALFSIBLINE	0.188422	70.7965	9	1.12062e-11	0.548269	0.578184	0.25
	Tests the null hypothesis that the error covariance matrix of the orthonormalized transformed dependent variables is proportional to an identity matrix.
	a. Design: Intercept Within Subjects Design: SEASON + HALFSIBLINE + SEASON * HALFSIBLINE
	b. May be used to adjust the degrees of freedom for the averaged tests of significance. Corrected tests are displayed in the Tests of Within-Subjects Effects table.
	Tests of Within-Subjects Effects
	Measure: MEASURE_1
	Source		Type III Sum of Squares	df	Mean Square	F	Sig.	Partial Eta Squared
	SEASON	Sphericity Assumed	6.51316	1	6.51316	43.3188	4.70353e-08	0.496099
		Greenhouse-Geisser	6.51316	1	6.51316	43.3188	4.70353e-08	0.496099
		Huynh-Feldt	6.51316	1	6.51316	43.3188	4.70353e-08	0.496099
		Lower-bound	6.51316	1	6.51316	43.3188	4.70353e-08	0.496099
	Error(SEASON)	Sphericity Assumed	6.61559	44	0.150354
		Greenhouse-Geisser	6.61559	44	0.150354
		Huynh-Feldt	6.61559	44	0.150354
		Lower-bound	6.61559	44	0.150354
	HALFSIBLINE	Sphericity Assumed	4.26448	4	1.06612	25.8376	7.40889e-17	0.369967
		Greenhouse-Geisser	4.26448	2.61416	1.6313	25.8376	8.34944e-12	0.369967
		Huynh-Feldt	4.26448	2.79412	1.52623	25.8376	1.8361e-12	0.369967
		Lower-bound	4.26448	1	4.26448	25.8376	7.32488e-06	0.369967
	Error(HALFSIBLINE)	Sphericity Assumed	7.26216	176	0.0412623
		Greenhouse-Geisser	7.26216	115.023	0.0631367
		Huynh-Feldt	7.26216	122.941	0.0590702
		Lower-bound	7.26216	44	0.165049
	SEASON * HALFSIBLINE	Sphericity Assumed	1.88907	4	0.472267	6.71505	4.72004e-05	0.132407
		Greenhouse-Geisser	1.88907	2.19307	0.861378	6.71505	0.00134319	0.132407
		Huynh-Feldt	1.88907	2.31273	0.81681	6.71505	0.0010731	0.132407
		Lower-bound	1.88907	1	1.88907	6.71505	0.0129225	0.132407
	Error(SEASON*HALFSIBLINE)	Sphericity Assumed	12.378	176	0.0703296
		Greenhouse-Geisser	12.378	96.4953	0.128276
		Huynh-Feldt	12.378	101.76	0.121639
		Lower-bound	12.378	44	0.281318
	Tests of Within-Subjects Contrasts
	Measure: MEASURE_1
	Source			Type III Sum of Squares	df	Mean Square	F	Sig.	Partial Eta Squared
	SEASON	Linear		6.51316	1	6.51316	43.3188	4.70353e-08	0.496099
	Error(SEASON)	Linear		6.61559	44	0.150354
	HALFSIBLINE		Linear	0.0333793	1	0.0333793	0.640942	0.427672	0.0143577
			Quadratic	3.13332	1	3.13332	62.8862	5.08426e-10	0.588347
			Cubic	0.757596	1	0.757596	15.5085	0.000289272	0.26061
			Order 4	0.34018	1	0.34018	23.7969	1.44011e-05	0.351003
	Error(HALFSIBLINE)		Linear	2.29145	44	0.0520785
			Quadratic	2.19231	44	0.0498253
			Cubic	2.14941	44	0.0488503
			Order 4	0.628986	44	0.0142951
	SEASON * HALFSIBLINE	Linear	Linear	0.492476	1	0.492476	10.601	0.00217868	0.194153
			Quadratic	0.98521	1	0.98521	20.0508	5.29174e-05	0.313045
			Cubic	0.107671	1	0.107671	2.83364	0.0993925	0.0605043
			Order 4	0.303708	1	0.303708	2.05585	0.158692	0.0446381
	Error(SEASON*HALFSIBLINE)	Linear	Linear	2.04406	44	0.0464558
			Quadratic	2.16197	44	0.0491357
			Cubic	1.6719	44	0.0379977
			Order 4	6.50008	44	0.147729
	Tests of Between-Subjects Effects
	Measure: MEASURE_1 Transformed Variable: Average
	Source	Type III Sum of Squares	df	Mean Square	F	Sig.	Partial Eta Squared
	Intercept	64.8539	1	64.8539	141.294	2.49297e-15	0.76254
	Error	20.196	44	0.458999
	Estimated Marginal Means
	1. SEASON
	Measure: MEASURE_1
	SEASON	Mean	Std. Error	95% Confidence Interval
				Lower Bound	Upper Bound
	1	0.259324	0.0259906	0.206944	0.311705
	2	0.499938	0.0450858	0.409073	0.590802
	2. HALFSIBLINE
	Measure: MEASURE_1
	HALFSIBLINE	Mean	Std. Error	95% Confidence Interval
				Lower Bound	Upper Bound
	1	0.270411	0.0258232	0.218368	0.322454
	2	0.464222	0.0419254	0.379727	0.548717
	3	0.523456	0.0435593	0.435668	0.611243
	4	0.335989	0.0340393	0.267387	0.40459
	5	0.304078	0.038121	0.22725	0.380906
	3. SEASON * HALFSIBLINE
	Measure: MEASURE_1
	SEASON		Mean	Std. Error	95% Confidence Interval
					Lower Bound	Upper Bound
	1	1	0.158844	0.0201683	0.118198	0.199491
		2	0.345622	0.0386294	0.26777	0.423475
		3	0.500733	0.0678581	0.363974	0.637492
		4	0.214356	0.0316529	0.150563	0.278148
		5	0.0770667	0.0143719	0.048102	0.106031
	2	1	0.381978	0.0427852	0.29575	0.468206
		2	0.582822	0.0536242	0.47475	0.690895
		3	0.546178	0.0584859	0.428307	0.664048
		4	0.457622	0.0532548	0.350294	0.56495
		5	0.531089	0.0691772	0.391671	0.670506

## Sheet: ANOVA ETR
	General Linear Model
	Within-Subjects Factors
	Measure: MEASURE_1
	SEASON		Dependent Variable
	1	1	ETR1_1
		2	ETR1_2
		3	ETR1_3
		4	ETR1_4
		5	ETR1_5
	2	1	ETR2_1
		2	ETR2_2
		3	ETR2_3
		4	ETR2_4
		5	ETR2_5
	Descriptive Statistics
		Mean	Std. Deviation	N
	ETR1_1	39.7844	34.4227	45
	ETR1_2	43.6533	27.8257	45
	ETR1_3	47.3711	33.2709	45
	ETR1_4	40.24	27.8491	45
	ETR1_5	47.7978	32.1416	45
	ETR2_1	75.8578	52.6531	45
	ETR2_2	66.2622	48.9601	45
	ETR2_3	73.7844	43.6547	45
	ETR2_4	63.2022	41.5998	45
	ETR2_5	66.3289	36.9398	45
	Multivariate Testsa
	Effect		Value	F	Hypothesis df	Error df	Sig.	Partial Eta Squared
	SEASON	Pillai's Trace	0.597803	65.399b	1	44	3.02677e-10	0.597803
		Wilks' Lambda	0.402197	65.399b	1	44	3.02677e-10	0.597803
		Hotelling's Trace	1.48634	65.399b	1	44	3.02677e-10	0.597803
		Roy's Largest Root	1.48634	65.399b	1	44	3.02677e-10	0.597803
	HALFSIBLINE	Pillai's Trace	0.248802	3.395b	4	41	0.017311	0.248802
		Wilks' Lambda	0.751198	3.395b	4	41	0.017311	0.248802
		Hotelling's Trace	0.331208	3.395b	4	41	0.017311	0.248802
		Roy's Largest Root	0.331208	3.395b	4	41	0.017311	0.248802
	SEASON * HALFSIBLINE	Pillai's Trace	0.11028	1.270b	4	41	0.297173	0.11028
		Wilks' Lambda	0.88972	1.270b	4	41	0.297173	0.11028
		Hotelling's Trace	0.123949	1.270b	4	41	0.297173	0.11028
		Roy's Largest Root	0.123949	1.270b	4	41	0.297173	0.11028
	a. Design: Intercept Within Subjects Design: SEASON + HALFSIBLINE + SEASON * HALFSIBLINE
	b. Exact statistic
	Mauchly's Test of Sphericitya
	Measure: MEASURE_1
	Within Subjects Effect	Mauchly's W	Approx. Chi-Square	df	Sig.	Epsilonb
						Greenhouse-Geisser	Huynh-Feldt	Lower-bound
	SEASON	1	0	0		1	1	1
	HALFSIBLINE	0.115752	91.4631	9	9.02697e-16	0.582505	0.617056	0.25
	SEASON * HALFSIBLINE	0.460028	32.9352	9	0.000138725	0.753663	0.815288	0.25
	Tests the null hypothesis that the error covariance matrix of the orthonormalized transformed dependent variables is proportional to an identity matrix.
	a. Design: Intercept Within Subjects Design: SEASON + HALFSIBLINE + SEASON * HALFSIBLINE
	b. May be used to adjust the degrees of freedom for the averaged tests of significance. Corrected tests are displayed in the Tests of Within-Subjects Effects table.
	Tests of Within-Subjects Effects
	Measure: MEASURE_1
	Source		Type III Sum of Squares	df	Mean Square	F	Sig.	Partial Eta Squared
	SEASON	Sphericity Assumed	72111.4	1	72111.4	65.3991	3.02677e-10	0.597803
		Greenhouse-Geisser	72111.4	1	72111.4	65.3991	3.02677e-10	0.597803
		Huynh-Feldt	72111.4	1	72111.4	65.3991	3.02677e-10	0.597803
		Lower-bound	72111.4	1	72111.4	65.3991	3.02677e-10	0.597803
	Error(SEASON)	Sphericity Assumed	48516	44	1102.64
		Greenhouse-Geisser	48516	44	1102.64
		Huynh-Feldt	48516	44	1102.64
		Lower-bound	48516	44	1102.64
	HALFSIBLINE	Sphericity Assumed	3949.33	4	987.332	2.08074	0.0852699	0.0451541
		Greenhouse-Geisser	3949.33	2.33002	1694.98	2.08074	0.122191	0.0451541
		Huynh-Feldt	3949.33	2.46823	1600.07	2.08074	0.118648	0.0451541
		Lower-bound	3949.33	1	3949.33	2.08074	0.156249	0.0451541
	Error(HALFSIBLINE)	Sphericity Assumed	83514	176	474.511
		Greenhouse-Geisser	83514	102.521	814.604
		Huynh-Feldt	83514	108.602	768.992
		Lower-bound	83514	44	1898.04
	SEASON * HALFSIBLINE	Sphericity Assumed	3956.13	4	989.031	1.79871	0.131133	0.0392742
		Greenhouse-Geisser	3956.13	3.01465	1312.3	1.79871	0.150242	0.0392742
		Huynh-Feldt	3956.13	3.26115	1213.11	1.79871	0.14525	0.0392742
		Lower-bound	3956.13	1	3956.13	1.79871	0.186751	0.0392742
	Error(SEASON*HALFSIBLINE)	Sphericity Assumed	96774.9	176	549.857
		Greenhouse-Geisser	96774.9	132.645	729.579
		Huynh-Feldt	96774.9	143.491	674.433
		Lower-bound	96774.9	44	2199.43
	Tests of Within-Subjects Contrasts
	Measure: MEASURE_1
	Source			Type III Sum of Squares	df	Mean Square	F	Sig.	Partial Eta Squared
	SEASON	Linear		72111.4	1	72111.4	65.3991	3.02677e-10	0.597803
	Error(SEASON)	Linear		48516	44	1102.64
	HALFSIBLINE		Linear	203.253	1	203.253	0.248413	0.620677	0.00561406
			Quadratic	24.0562	1	24.0562	0.0768689	0.782885	0.00174397
			Cubic	294.008	1	294.008	1.03316	0.314974	0.0229423
			Order 4	3428.01	1	3428.01	7.10735	0.0106968	0.139067
	Error(HALFSIBLINE)		Linear	36001	44	818.204
			Quadratic	13769.8	44	312.951
			Cubic	12521.1	44	284.571
			Order 4	21222	44	482.319
	SEASON * HALFSIBLINE	Linear	Linear	2714.06	1	2714.06	4.23835	0.0454712	0.0878626
			Quadratic	187.843	1	187.843	0.469057	0.497014	0.0105479
			Cubic	749.299	1	749.299	1.82333	0.183823	0.0397903
			Order 4	304.92	1	304.92	0.407839	0.526379	0.00918394
	Error(SEASON*HALFSIBLINE)	Linear	Linear	28175.8	44	640.359
			Quadratic	17620.7	44	400.47
			Cubic	18081.9	44	410.952
			Order 4	32896.5	44	747.648
	Tests of Between-Subjects Effects
	Measure: MEASURE_1 Transformed Variable: Average
	Source	Type III Sum of Squares	df	Mean Square	F	Sig.	Partial Eta Squared
	Intercept	1.43286e+06	1	1.43286e+06	145.543	1.50893e-15	0.767863
	Error	433177	44	9844.94
	Estimated Marginal Means
	1. SEASON
	Measure: MEASURE_1
	SEASON	Mean	Std. Error	95% Confidence Interval
				Lower Bound	Upper Bound
	1	43.7693	3.67151	36.3699	51.1688
	2	69.0871	5.93093	57.1341	81.0401
	2. HALFSIBLINE
	Measure: MEASURE_1
	HALFSIBLINE	Mean	Std. Error	95% Confidence Interval
				Lower Bound	Upper Bound
	1	57.8211	5.66006	46.414	69.2282
	2	54.9578	5.3632	44.149	65.7666
	3	60.5778	4.68741	51.1309	70.0246
	4	51.7211	4.89445	41.857	61.5852
	5	57.0633	4.87341	47.2416	66.885
	3. SEASON * HALFSIBLINE
	Measure: MEASURE_1
	SEASON		Mean	Std. Error	95% Confidence Interval
					Lower Bound	Upper Bound
	1	1	39.7844	5.13143	29.4427	50.1262
		2	43.6533	4.14801	35.2936	52.0131
		3	47.3711	4.95973	37.3754	57.3668
		4	40.24	4.1515	31.8732	48.6068
		5	47.7978	4.79138	38.1414	57.4542
	2	1	75.8578	7.84905	60.039	91.6765
		2	66.2622	7.29854	51.553	80.9715
		3	73.7844	6.50765	60.6691	86.8998
		4	63.2022	6.20133	50.7043	75.7002
		5	66.3289	5.50666	55.231	77.4268
